# Supplementary material for: Silicon-photomultiplier-based PET/CT reduces the minimum detectable activity of iodine-124
Source: PubMed Central journal article supplement (PMC8410931; doi:10.1038/s41598-021-95719-8), 2021-09-01
Supplement: 41598_2021_95719_MOESM1_ESM.pdf [file 41598_2021_95719_MOESM1_ESM.pdf]

## Supplementary Material to:

# Silicon-Photomultiplier-Based PET/CT Reduces the Minimum Detectable Activity of Iodine-124

D. Kersting\*<sup>1,4</sup>, W. Jentzen<sup>1,4</sup>, P. Fragoso Costa<sup>1,4</sup>, M. Sraieb<sup>1,4</sup>, P. Sandach<sup>1,4</sup>, L. Umutlu<sup>2,4</sup>, M. Conti<sup>3</sup>, F. Zarrad<sup>1,4</sup>,  
C. Rischpler<sup>1,4</sup>, W. P. Fendler<sup>1,4</sup>, K. Herrmann<sup>1,4</sup>, and M. Weber<sup>1,4</sup>

<sup>1</sup> Department of Nuclear Medicine, University Hospital Essen, University of Duisburg-Essen, Essen, Germany

<sup>2</sup> Department of Diagnostic and Interventional Radiology and Neuroradiology, University Hospital Essen, University of Duisburg-Essen, Essen, Germany

<sup>3</sup> Siemens Medical Solutions USA, Inc., Knoxville, TN, United States

<sup>4</sup> German Cancer Consortium (DKTK, partner site Essen), Essen, Germany

## Supplemental Figure S1

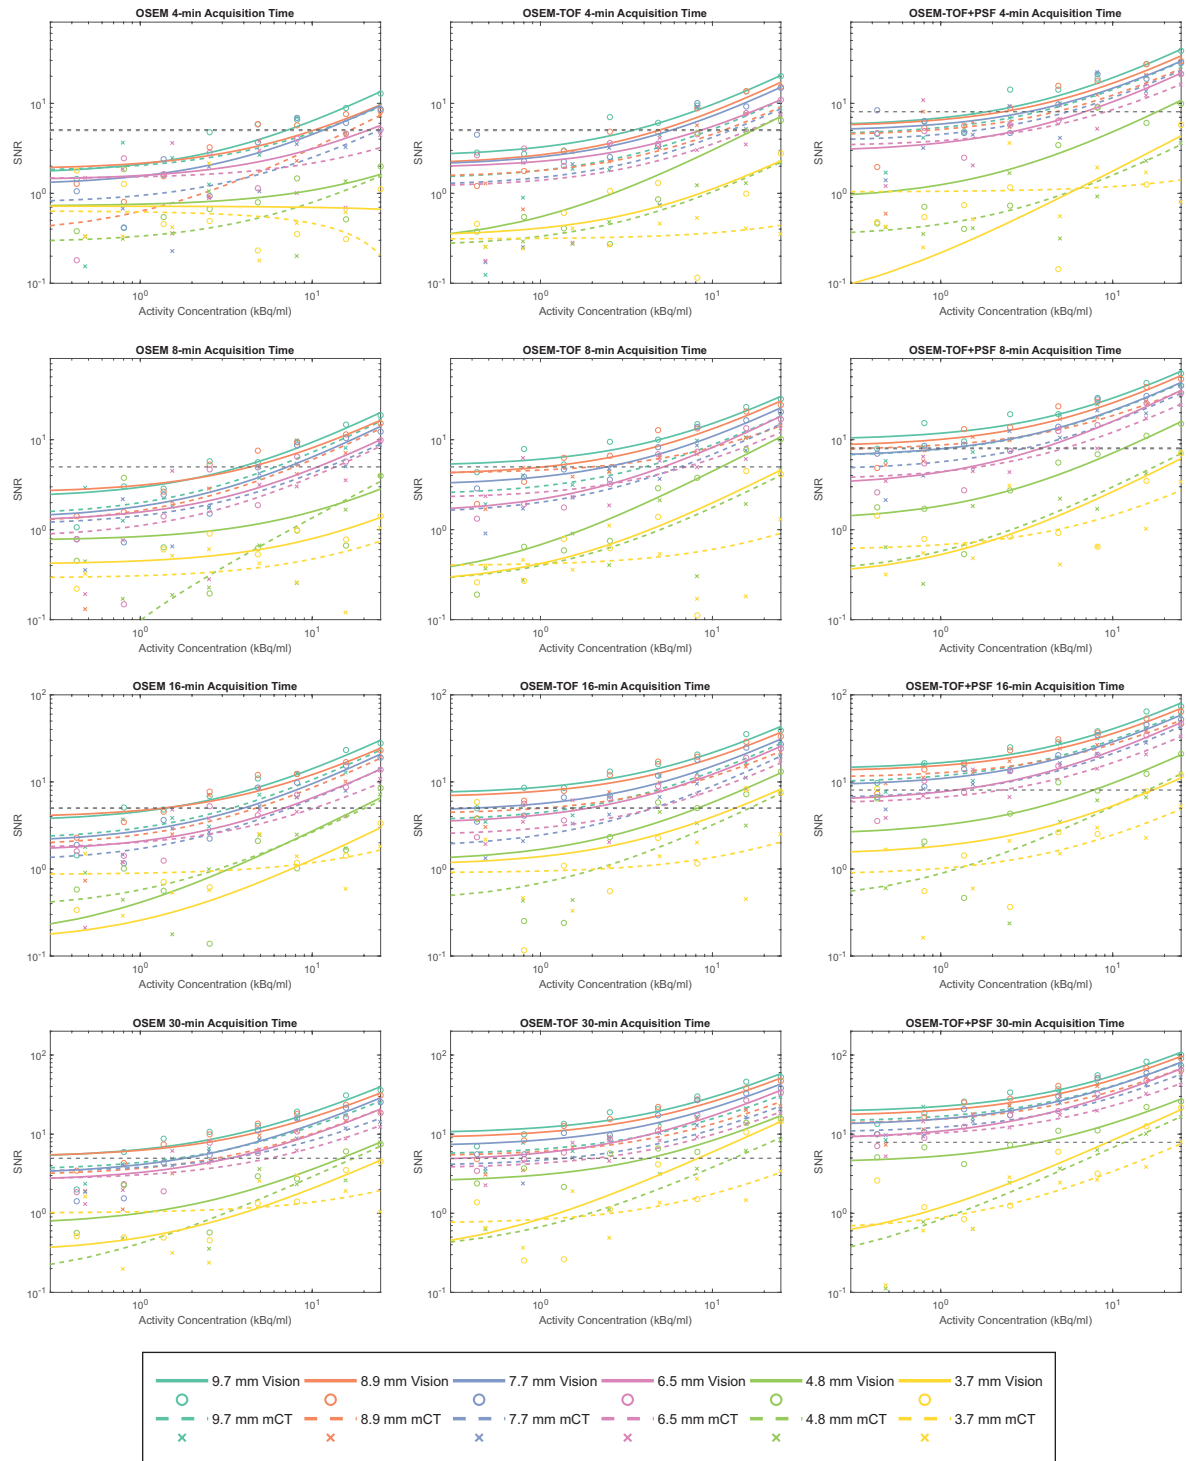

Figure 1: SNR as a function of the AC for all evaluated spheres, separately for all evaluated reconstruction algorithms and emission times. A horizontal line at SNR = 5 (OSEM and OSEM-TOF) or SNR = 8 (OSEM-TOF+PSF), respectively, indicates the threshold for visual detectability.

### Supplemental Table S1: Scanner Specifications

Technical specifications for the Biograph mCT and the Biograph Vision. LSO = Lutetium Oxyorthosilicate.

|                                               | Biograph mCT         | Biograph Vision      |
|-----------------------------------------------|----------------------|----------------------|
| Detector material                             | LSO                  | LSO                  |
| Detector element dimension (mm <sup>3</sup> ) | 4x4x20               | 3.2x3.2x20           |
| Detector elements per block                   | 13x13                | 16x16                |
| Total number of detector elements             | 33,448               | 60,800               |
| Signal readout                                | PMTs (2x2 per block) | SiPM (2x2 per block) |
| Axial FOV (cm)                                | 21.8                 | 26.3                 |
| Transaxial FOV (cm)                           | 70                   | 78                   |
| Plane spacing (mm)                            | 2                    | 1.65                 |
| Image planes                                  | 109                  | 119                  |
| Coincidence time window (ns)                  | 4.1                  | 4.7                  |
| Energy window (keV)                           | 435-650              | 435-585              |
| Energy resolution (%)                         | 11                   | 9                    |
| System time resolution (ps)                   | 540                  | 210                  |
| NEMA sensitivity (kcps/MBq)                   | 9.7                  | 16.4                 |

### Supplemental Table S2: Activity Concentration Characterization for Different Metastases

Activity Concentrations (AC) and AC to background AC for different types of differentiated thyroid cancer metastases.

|                                       | Lymph node metastases | Lung metastases | Bone metastases |
|---------------------------------------|-----------------------|-----------------|-----------------|
| <b>Number of evaluated metastases</b> | 89                    | 34              | 61              |
| <b>AC (kBq/ml)</b>                    |                       |                 |                 |
| mean                                  | 155                   | 22              | 104             |
| median                                | 72                    | 16              | 60              |
| standard deviation                    | 186                   | 16              | 124             |
| minimum-maximum                       | 1.6–691               | 3.5-72          | 5.4-684         |
| <b>Ratio AC to the background AC</b>  |                       |                 |                 |
| mean                                  | 1075                  | 91              | 659             |
| median                                | 346                   | 38              | 232             |
| standard deviation                    | 2069                  | 199             | 976             |
| minimum-maximum                       | 17–15538              | 11-1186         | 21-5167         |

Supplemental Table S3: MDA for each evaluated sphere size, PET/CT system, reconstruction algorithm and emission time.

| Sphere Diameter<br>(mm)        | Scanner | OSEM   |        |       |       | OSEM+TOF |        |       |       | OSEM+TOF+PSF |        |       |       |
|--------------------------------|---------|--------|--------|-------|-------|----------|--------|-------|-------|--------------|--------|-------|-------|
|                                |         | 30-min | 16-min | 8-min | 4-min | 30-min   | 16-min | 8-min | 4-min | 30-min       | 16-min | 8-min | 4-min |
| 3.7                            | Vision  | >25    | >25    | >25   | >25   | 8.33     | 13.59  | >25   | >25   | 9.51         | 16.96  | >25   | >25   |
|                                | mCT     | >25    | >25    | >25   | >25   | >25      | >25    | >25   | >25   | >25          | >25    | >25   | >25   |
| 4.8                            | Vision  | 14.86  | 18.87  | >25   | >25   | 4.32     | 8.22   | 11.26 | 17.16 | 3.87         | 7.67   | 11.52 | 17.96 |
|                                | mCT     | 17.59  | 20.29  | >25   | >25   | 13.41    | 16.43  | >25   | >25   | 11.86        | 15.87  | >25   | >25   |
| 6.5                            | Vision  | 3.36   | 6.88   | 10.76 | 20.93 | 0.38     | 1.91   | 5.20  | 8.50  | <0.26        | 1.20   | 3.82  | 6.80  |
|                                | mCT     | 5.74   | 10.25  | 13.66 | >25   | 2.15     | 4.60   | 7.05  | 16.19 | <0.26        | 2.21   | 5.19  | 8.98  |
| 7.7                            | Vision  | 1.86   | 3.99   | 7.22  | 11.47 | <0.26    | 0.41   | 2.45  | 5.70  | <0.26        | <0.26  | 1.06  | 3.15  |
|                                | mCT     | 3.36   | 7.42   | 12.34 | 24.33 | 1.43     | 4.53   | 6.52  | 12.68 | <0.26        | 1.16   | 3.05  | 5.43  |
| 8.9                            | Vision  | <0.26  | 1.36   | 4.38  | 10.12 | <0.26    | <0.26  | 1.05  | 4.85  | <0.26        | <0.26  | <0.26 | 2.25  |
|                                | mCT     | 2.82   | 4.72   | 7.92  | 16.50 | <0.26    | 1.03   | 2.00  | 11.53 | <0.26        | <0.26  | 0.33  | 4.57  |
| 9.7                            | Vision  | <0.26  | 1.41   | 3.86  | 7.08  | <0.26    | <0.26  | <0.26 | 3.42  | <0.26        | <0.26  | <0.26 | 1.81  |
|                                | mCT     | 1.68   | 3.39   | 6.14  | 10.95 | <0.26    | 1.57   | 4.07  | 9.61  | <0.26        | <0.26  | 1.12  | 3.66  |
| Ratio Vision/mCT               |         | 0.66   | 0.57   | 0.65  | 0.58  | 0.25     | 0.34   | 0.55  | 0.44  | 0.33         | 0.51   | 0.54  | 0.58  |
| Mean±SD                        |         | ±      | ±      | ±     | ±     | ±        | ±      | ±     | ±     | ±            | ±      | ±     | ±     |
|                                |         | 0.16   | 0.25   | 0.11  | 0.10  | 0.11     | 0.22   | 0.19  | 0.08  | 0            | 0.05   | 0.28  | 0.13  |
| Number of<br>evaluated spheres |         | 3      | 5      | 4     | 3     | 2        | 3      | 3     | 4     | 1            | 2      | 2     | 4     |

Presented values in units of kBq/ml. MDA <0.26 kBq/ml: No MDA could be calculated, as the SNR was > cut-off value for visual detection for all ACs (meaning detection for every examined AC). MDA >25 kBq/ml: No MDA could be calculated, as the SNR was < cut-off value for all ACs (meaning no detection for any examined AC).

**Supplemental Table S4: Human observer study results for the 3.7-mm sphere.**

The human observer study results are separately presented for the examined PET/CT scanners, reconstruction algorithms and emission times. 1 = detected.

0 = undetected.

| Sphere Activity Concentration (kBq/ml) | Scanner | OSEM   |        |       |       | OSEM+TOF |        |       |       | OSEM+TOF+PSF |        |       |       |
|----------------------------------------|---------|--------|--------|-------|-------|----------|--------|-------|-------|--------------|--------|-------|-------|
|                                        |         | 30 min | 16 min | 8 min | 4 min | 30 min   | 16 min | 8 min | 4 min | 30 min       | 16 min | 8 min | 4 min |
| 24.99                                  | Vision  | 0      | 0      | 0     | 0     | 1        | 1      | 0     | 0     | 1            | 1      | 0     | 0     |
| 24.85                                  | mCT     | 0      | 0      | 0     | 0     | 0        | 0      | 0     | 0     | 0            | 0      | 0     | 0     |
| 15.72                                  | Vision  | 0      | 0      | 0     | 0     | 1        | 0      | 0     | 0     | 1            | 0      | 0     | 0     |
| 15.63                                  | mCT     | 0      | 0      | 0     | 0     | 0        | 0      | 0     | 0     | 0            | 0      | 0     | 0     |
| 8.17                                   | Vision  | 0      | 0      | 0     | 0     | 0        | 0      | 0     | 0     | 0            | 0      | 0     | 0     |
| 8.13                                   | mCT     | 0      | 0      | 0     | 0     | 0        | 0      | 0     | 0     | 0            | 0      | 0     | 0     |
| 4.83                                   | Vision  | 0      | 0      | 0     | 0     | 1        | 0      | 0     | 0     | 1            | 0      | 0     | 0     |
| 4.93                                   | mCT     | 0      | 0      | 0     | 0     | 0        | 0      | 0     | 0     | 0            | 0      | 0     | 0     |
| 2.53                                   | Vision  | 0      | 0      | 0     | 0     | 0        | 0      | 0     | 0     | 0            | 0      | 0     | 0     |
| 2.51                                   | mCT     | 0      | 0      | 0     | 0     | 0        | 0      | 0     | 0     | 0            | 0      | 0     | 0     |
| 1.37                                   | Vision  | 0      | 0      | 0     | 0     | 0        | 0      | 0     | 0     | 0            | 0      | 0     | 0     |
| 1.54                                   | mCT     | 0      | 0      | 0     | 0     | 0        | 0      | 0     | 0     | 0            | 0      | 0     | 0     |
| 0.80                                   | Vision  | 0      | 0      | 0     | 0     | 0        | 0      | 0     | 0     | 0            | 0      | 0     | 0     |
| 0.79                                   | mCT     | 0      | 0      | 0     | 0     | 0        | 0      | 0     | 0     | 0            | 0      | 0     | 0     |
| 0.43                                   | Vision  | 0      | 0      | 0     | 0     | 0        | 0      | 0     | 0     | 0            | 0      | 0     | 0     |
| 0.48                                   | mCT     | 0      | 0      | 0     | 0     | 0        | 0      | 0     | 0     | 0            | 0      | 0     | 0     |
| 0.26                                   | Vision  | 0      | 0      | 0     | 0     | 0        | 0      | 0     | 0     | 0            | 0      | 0     | 0     |
| 0.25                                   | mCT     | 0      | 0      | 0     | 0     | 0        | 0      | 0     | 0     | 0            | 0      | 0     | 0     |

**Supplemental Table S5: Human observer study results for the 4.8-mm sphere.**

The human observer study results are separately presented for the examined PET/CT scanners, reconstruction algorithms and emission times. 1 = detected.

0 = undetected.

| Sphere Activity Concentration (kBq/ml) | Scanner | OSEM   |        |       |       | OSEM+TOF |        |       |       | OSEM+TOF+PSF |        |       |       |
|----------------------------------------|---------|--------|--------|-------|-------|----------|--------|-------|-------|--------------|--------|-------|-------|
|                                        |         | 30 min | 16 min | 8 min | 4 min | 30 min   | 16 min | 8 min | 4 min | 30 min       | 16 min | 8 min | 4 min |
| 24.99                                  | Vision  | 1      | 1      | 0     | 0     | 1        | 1      | 1     | 1     | 1            | 1      | 1     | 1     |
| 24.85                                  | mCT     | 1      | 1      | 0     | 0     | 1        | 1      | 0     | 0     | 1            | 1      | 1     | 0     |
| 15.72                                  | Vision  | 1      | 0      | 0     | 0     | 1        | 1      | 1     | 1     | 1            | 1      | 1     | 1     |
| 15.63                                  | mCT     | 0      | 0      | 0     | 0     | 1        | 0      | 0     | 0     | 1            | 1      | 0     | 0     |
| 8.17                                   | Vision  | 0      | 0      | 0     | 0     | 1        | 0      | 0     | 0     | 1            | 1      | 1     | 1     |
| 8.13                                   | mCT     | 0      | 0      | 0     | 0     | 0        | 0      | 0     | 0     | 1            | 1      | 0     | 0     |
| 4.83                                   | Vision  | 1      | 0      | 0     | 0     | 1        | 1      | 0     | 0     | 1            | 1      | 0     | 0     |
| 4.93                                   | mCT     | 0      | 0      | 0     | 0     | 0        | 0      | 0     | 0     | 0            | 0      | 0     | 0     |
| 2.53                                   | Vision  | 0      | 0      | 0     | 0     | 0        | 0      | 0     | 0     | 1            | 0      | 0     | 0     |
| 2.51                                   | mCT     | 0      | 0      | 0     | 0     | 0        | 0      | 0     | 0     | 0            | 0      | 0     | 0     |
| 1.37                                   | Vision  | 0      | 0      | 0     | 0     | 0        | 0      | 0     | 0     | 1            | 0      | 0     | 0     |
| 1.54                                   | mCT     | 0      | 0      | 0     | 0     | 0        | 0      | 0     | 0     | 0            | 0      | 0     | 0     |
| 0.80                                   | Vision  | 0      | 0      | 0     | 0     | 0        | 0      | 0     | 0     | 0            | 0      | 0     | 0     |
| 0.79                                   | mCT     | 0      | 0      | 0     | 0     | 0        | 0      | 0     | 0     | 0            | 0      | 0     | 0     |
| 0.43                                   | Vision  | 0      | 0      | 0     | 0     | 0        | 0      | 0     | 0     | 0            | 0      | 0     | 0     |
| 0.48                                   | mCT     | 0      | 0      | 0     | 0     | 0        | 0      | 0     | 0     | 0            | 0      | 0     | 0     |
| 0.26                                   | Vision  | 0      | 0      | 0     | 0     | 0        | 0      | 0     | 0     | 0            | 0      | 0     | 0     |
| 0.25                                   | mCT     | 0      | 0      | 0     | 0     | 0        | 0      | 0     | 0     | 0            | 0      | 0     | 0     |

**Supplemental Table S6: Human observer study results for the 6.5-mm sphere.**

The human observer study results are separately presented for the examined PET/CT scanners, reconstruction algorithms and emission times. 1 = detected.

0 = undetected.

| Sphere Activity Concentration (kBq/ml) | Scanner | OSEM   |        |       |       | OSEM+TOF |        |       |       | OSEM+TOF+PSF |        |       |       |
|----------------------------------------|---------|--------|--------|-------|-------|----------|--------|-------|-------|--------------|--------|-------|-------|
|                                        |         | 30 min | 16 min | 8 min | 4 min | 30 min   | 16 min | 8 min | 4 min | 30 min       | 16 min | 8 min | 4 min |
| 24.99                                  | Vision  | 1      | 1      | 1     | 1     | 1        | 1      | 1     | 1     | 1            | 1      | 1     | 1     |
| 24.85                                  | mCT     | 1      | 1      | 1     | 0     | 1        | 1      | 1     | 1     | 1            | 1      | 1     | 1     |
| 15.72                                  | Vision  | 1      | 1      | 1     | 1     | 1        | 1      | 1     | 1     | 1            | 1      | 1     | 1     |
| 15.63                                  | mCT     | 1      | 1      | 1     | 0     | 1        | 1      | 1     | 0     | 1            | 1      | 1     | 1     |
| 8.17                                   | Vision  | 1      | 1      | 1     | 0     | 1        | 1      | 1     | 1     | 1            | 1      | 1     | 1     |
| 8.13                                   | mCT     | 1      | 0      | 0     | 0     | 1        | 1      | 0     | 0     | 1            | 1      | 1     | 0     |
| 4.83                                   | Vision  | 1      | 1      | 0     | 0     | 1        | 1      | 1     | 0     | 1            | 1      | 1     | 1     |
| 4.93                                   | mCT     | 1      | 0      | 0     | 0     | 1        | 1      | 0     | 0     | 1            | 1      | 1     | 0     |
| 2.53                                   | Vision  | 1      | 0      | 0     | 0     | 1        | 1      | 1     | 0     | 1            | 1      | 1     | 1     |
| 2.51                                   | mCT     | 0      | 0      | 0     | 0     | 0        | 0      | 0     | 0     | 1            | 1      | 0     | 0     |
| 1.37                                   | Vision  | 0      | 0      | 0     | 0     | 1        | 1      | 0     | 0     | 1            | 1      | 0     | 0     |
| 1.54                                   | mCT     | 0      | 0      | 0     | 0     | 0        | 0      | 0     | 0     | 1            | 1      | 0     | 0     |
| 0.80                                   | Vision  | 0      | 0      | 0     | 0     | 1        | 1      | 0     | 0     | 1            | 1      | 1     | 0     |
| 0.79                                   | mCT     |        | 0      | 0     | 0     | 0        | 0      | 0     | 0     | 1            | 0      | 0     | 0     |
| 0.43                                   | Vision  | 0      | 0      | 0     | 0     | 0        | 0      | 0     | 0     | 1            | 0      | 0     | 0     |
| 0.48                                   | mCT     | 0      | 0      | 0     | 0     | 0        | 0      | 0     | 0     | 0            | 0      | 0     | 0     |
| 0.26                                   | Vision  | 0      | 0      | 0     | 0     | 0        | 0      | 0     | 0     | 0            | 0      | 0     | 0     |
| 0.25                                   | mCT     | 0      | 0      | 0     | 0     | 0        | 0      | 0     | 0     | 0            | 0      | 0     | 0     |



Supplemental Table S7: Human observer study results for the 7.7-mm sphere.

The human observer study results are separately presented for the examined PET/CT scanners, reconstruction algorithms and emission times. 1 = detected.

0 = undetected.

| Sphere Activity Concentration (kBq/ml) | Scanner | OSEM   |        |       |       | OSEM+TOF |        |       |       | OSEM+TOF+PSF |        |       |       |
|----------------------------------------|---------|--------|--------|-------|-------|----------|--------|-------|-------|--------------|--------|-------|-------|
|                                        |         | 30 min | 16 min | 8 min | 4 min | 30 min   | 16 min | 8 min | 4 min | 30 min       | 16 min | 8 min | 4 min |
| 24.99                                  | Vision  | 1      | 1      | 1     | 1     | 1        | 1      | 1     | 1     | 1            | 1      | 1     | 1     |
| 24.85                                  | mCT     | 1      | 1      | 1     | 1     | 1        | 1      | 1     | 1     | 1            | 1      | 1     | 1     |
| 15.72                                  | Vision  | 1      | 1      | 1     | 1     | 1        | 1      | 1     | 1     | 1            | 1      | 1     | 1     |
| 15.63                                  | mCT     | 1      | 1      | 1     | 1     | 1        | 1      | 1     | 1     | 1            | 1      | 1     | 1     |
| 8.17                                   | Vision  | 1      | 1      | 1     | 1     | 1        | 1      | 1     | 1     | 1            | 1      | 1     | 1     |
| 8.13                                   | mCT     | 1      | 1      | 0     | 0     | 1        | 1      | 1     | 1     | 1            | 1      | 1     | 1     |
| 4.83                                   | Vision  | 1      | 1      | 1     | 0     | 1        | 1      | 1     | 1     | 1            | 1      | 1     | 1     |
| 4.93                                   | mCT     | 1      | 1      | 0     | 0     | 1        | 1      | 0     | 0     | 1            | 1      | 1     | 0     |
| 2.53                                   | Vision  | 1      | 1      | 0     | 0     | 1        | 1      | 1     | 1     | 1            | 1      | 1     | 1     |
| 2.51                                   | mCT     | 1      | 0      | 0     | 0     | 1        | 0      | 0     | 0     | 1            | 1      | 1     | 0     |
| 1.37                                   | Vision  | 0      | 0      | 0     | 0     | 1        | 1      | 1     | 0     | 1            | 1      | 1     | 1     |
| 1.54                                   | mCT     | 0      | 0      | 0     | 0     | 0        | 0      | 0     | 0     | 1            | 1      | 0     | 0     |
| 0.80                                   | Vision  | 0      | 0      | 0     | 0     | 1        | 1      | 1     | 0     | 1            | 1      | 1     | 0     |
| 0.79                                   | mCT     | 0      | 0      | 0     | 0     | 1        | 0      | 0     | 0     | 1            | 1      | 0     | 0     |
| 0.43                                   | Vision  | 0      | 0      | 0     | 0     | 1        | 0      | 0     | 0     | 1            | 1      | 0     | 0     |
| 0.48                                   | mCT     | 0      | 0      | 0     | 0     | 0        | 0      | 0     | 0     | 0            | 0      | 0     | 0     |
| 0.26                                   | Vision  | 0      | 0      | 0     | 0     | 0        | 0      | 0     | 0     | 0            | 0      | 0     | 0     |
| 0.25                                   | mCT     | 0      | 0      | 0     | 0     | 0        | 0      | 0     | 0     | 0            | 0      | 0     | 0     |

Supplemental Table S8: Human observer study results for the 8.9-mm sphere.

The human observer study results are separately presented for the examined PET/CT scanners, reconstruction algorithms and emission times. 1 = detected.

0 = undetected.

| Sphere Activity Concentration (kBq/ml) | Scanner | OSEM   |        |       |       | OSEM+TOF |        |       |       | OSEM+TOF+PSF |        |       |       |
|----------------------------------------|---------|--------|--------|-------|-------|----------|--------|-------|-------|--------------|--------|-------|-------|
|                                        |         | 30 min | 16 min | 8 min | 4 min | 30 min   | 16 min | 8 min | 4 min | 30 min       | 16 min | 8 min | 4 min |
| 24.99                                  | Vision  | 1      | 1      | 1     | 1     | 1        | 1      | 1     | 1     | 1            | 1      | 1     | 1     |
| 24.85                                  | mCT     | 1      | 1      | 1     | 1     | 1        | 1      | 1     | 1     | 1            | 1      | 1     | 1     |
| 15.72                                  | Vision  | 1      | 1      | 1     | 1     | 1        | 1      | 1     | 1     | 1            | 1      | 1     | 1     |
| 15.63                                  | mCT     | 1      | 1      | 1     | 0     | 1        | 1      | 1     | 1     | 1            | 1      | 1     | 1     |
| 8.17                                   | Vision  | 1      | 1      | 1     | 1     | 1        | 1      | 1     | 1     | 1            | 1      | 1     | 1     |
| 8.13                                   | mCT     | 1      | 1      | 0     | 0     | 1        | 1      | 1     | 1     | 1            | 1      | 1     | 1     |
| 4.83                                   | Vision  | 1      | 1      | 1     | 1     | 1        | 1      | 1     | 1     | 1            | 1      | 1     | 1     |
| 4.93                                   | mCT     | 1      | 1      | 0     | 0     | 1        | 1      | 1     | 0     | 1            | 1      | 1     | 1     |
| 2.53                                   | Vision  | 1      | 1      | 1     | 0     | 1        | 1      | 1     | 1     | 1            | 1      | 1     | 1     |
| 2.51                                   | mCT     | 1      | 0      | 0     | 0     | 1        | 1      | 0     | 0     | 1            | 1      | 1     | 0     |
| 1.37                                   | Vision  | 1      | 0      | 0     | 0     | 1        | 1      | 1     | 0     | 1            | 1      | 1     | 1     |
| 1.54                                   | mCT     | 0      | 0      | 0     | 0     | 1        | 0      | 0     | 0     | 1            | 1      | 0     | 0     |
| 0.80                                   | Vision  | 1      | 0      | 0     | 0     | 1        | 1      | 1     | 0     | 1            | 1      | 1     | 0     |
| 0.79                                   | mCT     | 0      | 0      | 0     | 0     | 1        | 0      | 0     | 0     | 1            | 1      | 0     | 0     |
| 0.43                                   | Vision  | 0      | 0      | 0     | 0     | 1        | 1      | 0     | 0     | 1            | 1      | 0     | 0     |
| 0.48                                   | mCT     | 0      | 0      | 0     | 0     | 0        | 0      | 0     | 0     | 1            | 0      | 0     | 0     |
| 0.26                                   | Vision  | 0      | 0      | 0     | 0     | 1        | 1      | 0     | 0     | 1            | 1      | 0     | 0     |
| 0.25                                   | mCT     | 0      | 0      | 0     | 0     | 0        | 0      | 0     | 0     | 0            | 0      | 0     | 0     |

Supplemental Table S9: Human observer study results for the 9.7-mm sphere.

The human observer study results are separately presented for the examined PET/CT scanners, reconstruction algorithms and emission times. 1 = detected.

0 = undetected.

| Sphere Activity Concentration (kBq/ml) | Scanner | OSEM   |        |       |       | OSEM+TOF |        |       |       | OSEM+TOF+PSF |        |       |       |
|----------------------------------------|---------|--------|--------|-------|-------|----------|--------|-------|-------|--------------|--------|-------|-------|
|                                        |         | 30 min | 16 min | 8 min | 4 min | 30 min   | 16 min | 8 min | 4 min | 30 min       | 16 min | 8 min | 4 min |
| 24.99                                  | Vision  | 1      | 1      | 1     | 1     | 1        | 1      | 1     | 1     | 1            | 1      | 1     | 1     |
| 24.85                                  | mCT     | 1      | 1      | 1     | 1     | 1        | 1      | 1     | 1     | 1            | 1      | 1     | 1     |
| 15.72                                  | Vision  | 1      | 1      | 1     | 1     | 1        | 1      | 1     | 1     | 1            | 1      | 1     | 1     |
| 15.63                                  | mCT     | 1      | 1      | 1     | 1     | 1        | 1      | 1     | 1     | 1            | 1      | 1     | 1     |
| 8.17                                   | Vision  | 1      | 1      | 1     | 1     | 1        | 1      | 1     | 1     | 1            | 1      | 1     | 1     |
| 8.13                                   | mCT     | 1      | 1      | 1     | 1     | 1        | 1      | 1     | 1     | 1            | 1      | 1     | 1     |
| 4.83                                   | Vision  | 1      | 1      | 1     | 1     | 1        | 1      | 1     | 1     | 1            | 1      | 1     | 1     |
| 4.93                                   | mCT     | 1      | 1      | 0     | 0     | 1        | 1      | 1     | 0     | 1            | 1      | 1     | 1     |
| 2.53                                   | Vision  | 1      | 1      | 1     | 0     | 1        | 1      | 1     | 1     | 1            | 1      | 1     | 1     |
| 2.51                                   | mCT     | 1      | 0      | 0     | 0     | 1        | 1      | 0     | 0     | 1            | 1      | 1     | 0     |
| 1.37                                   | Vision  | 1      | 1      | 0     | 0     | 1        | 1      | 1     | 0     | 1            | 1      | 1     | 1     |
| 1.54                                   | mCT     | 0      | 0      | 0     | 0     | 1        | 0      | 0     | 0     | 1            | 1      | 0     | 0     |
| 0.80                                   | Vision  | 1      | 1      | 0     | 0     | 1        | 1      | 1     | 0     | 1            | 1      | 1     | 0     |
| 0.79                                   | mCT     | 0      | 0      | 0     | 0     | 1        | 0      | 0     | 0     | 1            | 1      | 0     | 0     |
| 0.43                                   | Vision  | 0      | 0      | 0     | 0     | 1        | 1      | 0     | 0     | 1            | 1      | 0     | 0     |
| 0.48                                   | mCT     | 0      | 0      | 0     | 0     | 0        | 0      | 0     | 0     | 1            | 0      | 0     | 0     |
| 0.26                                   | Vision  | 0      | 0      | 0     | 0     | 1        | 1      | 0     | 0     | 1            | 1      | 0     | 0     |
| 0.25                                   | mCT     | 0      | 0      | 0     | 0     | 0        | 0      | 0     | 0     | 0            | 0      | 0     | 0     |

Supplemental Table S10: SNR for the 3.7-mm sphere.

The SNR values are separately presented for the examined PET/CT scanners, reconstruction algorithms and emission times.

| Sphere Activity Concentration (kBq/ml) | Scanner | OSEM   |        |       |       | OSEM+TOF |        |       |       | OSEM+TOF+PSF |        |       |       |
|----------------------------------------|---------|--------|--------|-------|-------|----------|--------|-------|-------|--------------|--------|-------|-------|
|                                        |         | 30 min | 16 min | 8 min | 4 min | 30 min   | 16 min | 8 min | 4 min | 30 min       | 16 min | 8 min | 4 min |
| 24.99                                  | Vision  | 4.51   | 3.35   | 1.41  | 1.11  | 14.55    | 7.53   | 4.11  | 2.78  | 21.68        | 11.90  | 7.07  | 5.77  |
| 24.85                                  | mCT     | 1.05   | 1.82   | 1.04  | 0.00  | 3.42     | 2.50   | 1.31  | 0.36  | 8.05         | 5.25   | 3.42  | 0.81  |
| 15.72                                  | Vision  | 3.51   | 1.42   | 0.78  | 0.31  | 10.56    | 8.25   | 4.48  | 0.99  | 12.56        | 7.81   | 3.49  | 1.25  |
| 15.63                                  | mCT     | 1.91   | 0.59   | 0.12  | 0.62  | 1.47     | 0.45   | 0.18  | 0.41  | 3.85         | 2.28   | 1.02  | 1.71  |
| 8.17                                   | Vision  | 1.40   | 1.18   | 0.99  | 0.35  | 1.51     | 1.15   | 0.11  | 0.12  | 3.18         | 2.52   | 0.65  | 0.08  |
| 8.13                                   | mCT     | 3.03   | 1.40   | 0.26  | 0.47  | 2.73     | 2.01   | 0.17  | 0.53  | 2.66         | 2.98   | 0.65  | 1.93  |
| 4.83                                   | Vision  | 1.33   | 0.07   | 0.53  | 0.23  | 4.15     | 2.26   | 1.39  | 1.30  | 5.98         | 2.64   | 0.92  | 0.14  |
| 4.93                                   | mCT     | 2.56   | 2.53   | 0.42  | 0.18  | 1.37     | 1.40   | 0.54  | 0.46  | 2.44         | 1.50   | 0.41  | 0.56  |
| 2.53                                   | Vision  | 0.46   | 0.62   | 0.90  | 0.49  | 1.12     | 0.56   | 0.62  | 1.06  | 1.25         | 0.37   | 0.83  | 1.17  |
| 2.51                                   | mCT     | 0.24   | 0.57   | 0.61  | 2.16  | 0.49     | 1.07   | 1.11  | 0.26  | 2.85         | 2.10   | 3.09  | 3.63  |
| 1.37                                   | Vision  | 0.49   | 0.71   | 0.60  | 0.46  | 0.26     | 1.09   | 0.79  | 0.61  | 0.84         | 1.42   | 0.65  | 0.74  |
| 1.54                                   | mCT     | 0.32   | 0.53   | 0.51  | 0.42  | 1.90     | 0.33   | 0.36  | 0.41  | 0.64         | 0.60   | 0.48  | 0.51  |
| 0.80                                   | Vision  | 0.50   | 0.03   | 0.08  | 1.27  | 0.25     | 0.12   | 0.27  | 0.09  | 1.20         | 0.56   | 0.79  | 0.55  |
| 0.79                                   | mCT     | 0.20   | 0.29   | 0.08  | 0.33  | 0.37     | 0.46   | 0.46  | 0.24  | 0.60         | 0.16   | 0.55  | 0.25  |
| 0.43                                   | Vision  | 0.51   | 0.34   | 0.22  | 1.79  | 1.37     | 5.87   | 0.26  | 0.46  | 2.59         | 8.32   | 1.43  | 0.48  |
| 0.48                                   | mCT     | 1.63   | 1.49   | 0.32  | 0.33  | 0.66     | 2.18   | 0.40  | 0.25  | 0.12         | 1.67   | 0.32  | 0.43  |
| 0.26                                   | Vision  | 0.47   | 0.29   | 0.45  | 0.33  | 2.23     | 0.03   | 0.49  | 0.24  | 1.53         | 0.36   | 0.71  | 0.42  |
| 0.25                                   | mCT     | 0.34   | 0.42   | 0.31  | 0.20  | 0.27     | 0.40   | 0.27  | 0.18  | 0.65         | 0.64   | 0.47  | 0.39  |

Supplemental Table S11: SNR for the 4.8-mm sphere.

The SNR values are separately presented for the examined PET/CT scanners, reconstruction algorithms and emission times.

| Sphere Activity Concentration (kBq/ml) | Scanner | OSEM   |        |       |       | OSEM+TOF |        |       |       | OSEM+TOF+PSF |        |       |       |
|----------------------------------------|---------|--------|--------|-------|-------|----------|--------|-------|-------|--------------|--------|-------|-------|
|                                        |         | 30 min | 16 min | 8 min | 4 min | 30 min   | 16 min | 8 min | 4 min | 30 min       | 16 min | 8 min | 4 min |
| 24.99                                  | Vision  | 7.48   | 8.47   | 3.97  | 1.99  | 15.75    | 13.13  | 10.15 | 6.49  | 25.92        | 20.97  | 15.04 | 9.95  |
| 24.85                                  | mCT     | 7.85   | 7.17   | 3.98  | 1.56  | 8.43     | 7.75   | 4.59  | 2.21  | 16.49        | 12.51  | 7.34  | 3.64  |
| 15.72                                  | Vision  | 6.06   | 1.65   | 0.67  | 0.51  | 13.93    | 7.23   | 7.76  | 4.90  | 22.02        | 12.37  | 11.06 | 6.06  |
| 15.63                                  | mCT     | 2.60   | 1.73   | 1.67  | 1.36  | 6.18     | 3.15   | 1.93  | 1.30  | 10.09        | 6.64   | 4.21  | 2.30  |
| 8.17                                   | Vision  | 2.73   | 1.02   | 0.98  | 1.46  | 5.96     | 5.00   | 3.78  | 4.70  | 11.13        | 7.94   | 6.89  | 8.95  |
| 8.13                                   | mCT     | 2.33   | 2.49   | 0.25  | 0.20  | 3.66     | 3.36   | 0.30  | 1.23  | 6.31         | 6.14   | 1.70  | 0.92  |
| 4.83                                   | Vision  | 2.93   | 2.10   | 0.62  | 0.79  | 6.58     | 5.81   | 2.89  | 0.86  | 11.02        | 9.87   | 5.57  | 3.43  |
| 4.93                                   | mCT     | 3.63   | 2.45   | 0.67  | 0.08  | 3.15     | 4.52   | 2.12  | 0.72  | 3.69         | 3.48   | 2.21  | 0.31  |
| 2.53                                   | Vision  | 0.57   | 0.14   | 0.20  | 0.67  | 5.71     | 2.32   | 0.75  | 0.27  | 7.31         | 4.32   | 2.73  | 0.73  |
| 2.51                                   | mCT     | 0.36   | 0.99   | 0.23  | 1.06  | 1.11     | 0.09   | 0.40  | 0.48  | 2.44         | 0.24   | 0.03  | 1.68  |
| 1.37                                   | Vision  | 0.04   | 0.56   | 0.64  | 0.54  | 2.15     | 0.24   | 0.59  | 0.41  | 4.18         | 0.47   | 0.53  | 0.40  |
| 1.54                                   | mCT     | 0.07   | 0.18   | 0.19  | 0.36  | 0.01     | 0.44   | 0.91  | 0.27  | 0.63         | 0.09   | 1.83  | 0.41  |
| 0.80                                   | Vision  | 2.26   | 1.01   | 3.77  | 1.85  | 3.70     | 0.25   | 0.65  | 0.55  | 6.81         | 2.07   | 1.71  | 0.71  |
| 0.79                                   | mCT     | 0.48   | 0.44   | 0.17  | 0.31  | 0.05     | 0.43   | 0.27  | 0.29  | 0.78         | 1.84   | 0.25  | 0.35  |
| 0.43                                   | Vision  | 0.56   | 0.58   | 0.45  | 0.38  | 2.38     | 3.74   | 0.19  | 0.38  | 5.11         | 6.45   | 1.77  | 0.46  |
| 0.48                                   | mCT     | 0.03   | 0.91   | 0.44  | 0.33  | 0.63     | 0.06   | 0.37  | 0.25  | 0.11         | 0.60   | 0.64  | 0.42  |
| 0.26                                   | Vision  | 0.84   | 1.05   | 0.43  | 0.42  | 0.69     | 0.44   | 0.46  | 0.19  | 1.29         | 0.37   | 0.60  | 0.47  |
| 0.25                                   | mCT     | 0.24   | 0.32   | 0.27  | 0.30  | 0.32     | 0.37   | 0.27  | 0.18  | 0.02         | 0.41   | 0.43  | 0.38  |

Supplemental Table S12: SNR for the 6.5-mm sphere.

The SNR values are separately presented for the examined PET/CT scanners, reconstruction algorithms and emission times.

| Sphere Activity Concentration (kBq/ml) | Scanner | OSEM   |        |       |       | OSEM+TOF |        |       |       | OSEM+TOF+PSF |        |       |       |
|----------------------------------------|---------|--------|--------|-------|-------|----------|--------|-------|-------|--------------|--------|-------|-------|
|                                        |         | 30 min | 16 min | 8 min | 4 min | 30 min   | 16 min | 8 min | 4 min | 30 min       | 16 min | 8 min | 4 min |
| 24.99                                  | Vision  | 18.50  | 13.77  | 9.88  | 5.09  | 33.48    | 24.13  | 16.91 | 10.94 | 64.28        | 46.36  | 33.15 | 21.23 |
| 24.85                                  | mCT     | 12.36  | 10.82  | 9.62  | 4.44  | 18.34    | 17.71  | 13.35 | 7.49  | 41.96        | 33.44  | 24.34 | 16.22 |
| 15.72                                  | Vision  | 16.17  | 8.68   | 5.72  | 4.60  | 26.64    | 18.96  | 13.43 | 7.81  | 47.61        | 34.23  | 25.47 | 15.33 |
| 15.63                                  | mCT     | 8.79   | 4.01   | 3.54  | 0.69  | 13.59    | 8.31   | 6.09  | 3.50  | 32.49        | 20.73  | 17.31 | 12.26 |
| 8.17                                   | Vision  | 10.79  | 7.13   | 6.48  | 4.05  | 17.20    | 11.26  | 7.36  | 4.53  | 32.06        | 20.41  | 14.54 | 9.18  |
| 8.13                                   | mCT     | 6.23   | 4.54   | 3.02  | 1.01  | 9.23     | 7.18   | 4.96  | 3.02  | 19.83        | 14.21  | 8.01  | 5.22  |
| 4.83                                   | Vision  | 5.76   | 4.14   | 1.87  | 1.14  | 11.09    | 8.90   | 6.89  | 3.56  | 19.56        | 15.23  | 12.49 | 6.39  |
| 4.93                                   | mCT     | 6.45   | 4.75   | 3.16  | 2.99  | 8.32     | 7.94   | 5.84  | 4.13  | 17.47        | 15.41  | 13.66 | 6.72  |
| 2.53                                   | Vision  | 7.79   | 5.26   | 4.68  | 2.83  | 8.76     | 6.40   | 3.23  | 3.62  | 17.39        | 13.28  | 7.52  | 5.75  |
| 2.51                                   | mCT     | 4.34   | 3.81   | 0.28  | 0.89  | 4.60     | 2.04   | 1.86  | 3.50  | 12.13        | 6.69   | 4.36  | 6.02  |
| 1.37                                   | Vision  | 1.89   | 1.25   | 1.41  | 1.63  | 5.84     | 3.61   | 1.76  | 2.01  | 12.41        | 7.56   | 2.74  | 2.49  |
| 1.54                                   | mCT     | 6.16   | 4.81   | 4.51  | 3.63  | 7.80     | 6.15   | 2.33  | 0.28  | 17.36        | 13.87  | 4.47  | 2.04  |
| 0.80                                   | Vision  | 2.34   | 1.41   | 0.15  | 2.45  | 4.83     | 5.62   | 1.93  | 3.16  | 8.94         | 10.29  | 5.45  | 4.92  |
| 0.79                                   | mCT     | 1.96   | 1.20   | 0.76  | 1.86  | 4.50     | 3.48   | 6.26  | 2.19  | 14.50        | 6.92   | 6.50  | 10.86 |
| 0.43                                   | Vision  | 1.85   | 1.60   | 0.79  | 0.18  | 3.44     | 2.31   | 1.33  | 2.65  | 7.06         | 3.55   | 2.60  | 4.67  |
| 0.48                                   | mCT     | 1.31   | 0.21   | 0.19  | 1.49  | 2.26     | 1.93   | 2.36  | 0.18  | 5.24         | 3.86   | 3.47  | 1.20  |
| 0.26                                   | Vision  | 0.91   | 0.37   | 0.75  | 0.83  | 3.61     | 1.29   | 0.41  | 0.37  | 6.54         | 2.62   | 0.05  | 0.47  |
| 0.25                                   | mCT     | 0.44   | 0.22   | 0.31  | 0.30  | 0.99     | 0.25   | 0.21  | 0.18  | 2.06         | 0.26   | 0.45  | 0.14  |

**Supplemental Table S13: SNR for the 7.7-mm sphere.**

The SNR values are separately presented for the examined PET/CT scanners, reconstruction algorithms and emission times.

| Sphere Activity Concentration (kBq/ml) | Scanner | OSEM   |        |       |       | OSEM+TOF |        |       |       | OSEM+TOF+PSF |        |       |       |
|----------------------------------------|---------|--------|--------|-------|-------|----------|--------|-------|-------|--------------|--------|-------|-------|
|                                        |         | 30 min | 16 min | 8 min | 4 min | 30 min   | 16 min | 8 min | 4 min | 30 min       | 16 min | 8 min | 4 min |
| 24.99                                  | Vision  | 25.43  | 19.01  | 12.31 | 8.64  | 38.14    | 26.98  | 20.44 | 14.83 | 73.41        | 52.04  | 39.71 | 28.17 |
| 24.85                                  | mCT     | 14.30  | 14.00  | 8.75  | 4.90  | 20.57    | 19.89  | 15.39 | 7.61  | 52.52        | 42.25  | 31.57 | 21.23 |
| 15.72                                  | Vision  | 21.55  | 15.35  | 10.40 | 6.07  | 32.60    | 24.73  | 16.43 | 9.25  | 59.13        | 45.52  | 30.70 | 18.73 |
| 15.63                                  | mCT     | 11.90  | 7.90   | 5.06  | 3.26  | 16.36    | 11.17  | 7.59  | 5.20  | 42.05        | 28.19  | 19.62 | 13.59 |
| 8.17                                   | Vision  | 15.85  | 9.78   | 8.68  | 6.89  | 26.90    | 17.88  | 13.87 | 10.07 | 50.75        | 34.56  | 28.15 | 21.09 |
| 8.13                                   | mCT     | 8.81   | 6.65   | 5.41  | 3.52  | 12.95    | 9.53   | 8.63  | 9.03  | 29.63        | 21.13  | 21.15 | 22.27 |
| 4.83                                   | Vision  | 11.20  | 8.61   | 4.93  | 3.69  | 17.34    | 11.77  | 8.25  | 3.34  | 30.14        | 20.29  | 13.96 | 9.75  |
| 4.93                                   | mCT     | 8.51   | 5.28   | 4.21  | 1.05  | 10.34    | 6.71   | 3.67  | 0.74  | 24.95        | 16.42  | 10.53 | 4.14  |
| 2.53                                   | Vision  | 5.41   | 2.23   | 1.51  | 0.93  | 9.68     | 6.96   | 3.61  | 2.53  | 17.39        | 13.57  | 7.53  | 4.69  |
| 2.51                                   | mCT     | 6.10   | 2.65   | 1.79  | 1.98  | 8.32     | 4.22   | 4.77  | 3.20  | 20.04        | 13.07  | 12.46 | 9.34  |
| 1.37                                   | Vision  | 4.37   | 3.65   | 2.44  | 2.39  | 10.34    | 6.63   | 4.67  | 2.25  | 20.63        | 14.04  | 8.79  | 4.68  |
| 1.54                                   | mCT     | 4.01   | 2.92   | 0.65  | 0.23  | 5.03     | 3.32   | 2.27  | 2.12  | 14.54        | 9.42   | 4.91  | 4.49  |
| 0.80                                   | Vision  | 1.54   | 1.16   | 0.72  | 0.42  | 5.56     | 4.10   | 3.86  | 2.28  | 10.64        | 8.85   | 8.55  | 6.36  |
| 0.79                                   | mCT     | 4.01   | 1.46   | 2.19  | 0.68  | 2.38     | 2.09   | 1.72  | 0.25  | 9.34         | 8.30   | 3.99  | 3.19  |
| 0.43                                   | Vision  | 1.42   | 1.89   | 0.78  | 1.05  | 5.56     | 3.49   | 2.88  | 4.49  | 10.00        | 6.70   | 6.99  | 8.38  |
| 0.48                                   | mCT     | 1.86   | 0.05   | 0.36  | 0.08  | 3.68     | 1.33   | 0.91  | 0.17  | 9.70         | 4.83   | 2.13  | 1.40  |
| 0.26                                   | Vision  | 1.77   | 0.81   | 0.24  | 0.40  | 2.03     | 1.10   | 0.02  | 0.06  | 4.80         | 2.44   | 0.82  | 0.42  |
| 0.25                                   | mCT     | 0.06   | 0.16   | 0.24  | 1.52  | 0.15     | 0.01   | 0.26  | 0.18  | 1.17         | 0.68   | 1.50  | 0.37  |

**Supplemental Table S14: SNR for the 8.9-mm sphere.**

The SNR values are separately presented for the examined PET/CT scanners, reconstruction algorithms and emission times.

| Sphere Activity Concentration (kBq/ml) | Scanner | OSEM   |        |       |       | OSEM+TOF |        |       |       | OSEM+TOF+PSF |        |       |       |
|----------------------------------------|---------|--------|--------|-------|-------|----------|--------|-------|-------|--------------|--------|-------|-------|
|                                        |         | 30 min | 16 min | 8 min | 4 min | 30 min   | 16 min | 8 min | 4 min | 30 min       | 16 min | 8 min | 4 min |
| 24.99                                  | Vision  | 30.79  | 22.99  | 15.21 | 8.24  | 46.98    | 33.30  | 24.28 | 15.21 | 90.52        | 64.11  | 47.26 | 29.45 |
| 24.85                                  | mCT     | 18.91  | 19.37  | 14.27 | 7.34  | 22.61    | 22.06  | 14.53 | 7.51  | 60.25        | 47.50  | 32.39 | 21.05 |
| 15.72                                  | Vision  | 23.50  | 16.86  | 11.45 | 7.59  | 37.91    | 28.83  | 20.59 | 13.67 | 68.51        | 53.23  | 38.48 | 27.20 |
| 15.63                                  | mCT     | 14.72  | 10.11  | 7.13  | 4.39  | 20.09    | 14.99  | 10.44 | 7.73  | 51.34        | 38.67  | 26.72 | 20.80 |
| 8.17                                   | Vision  | 18.01  | 12.33  | 9.34  | 5.70  | 27.41    | 19.46  | 13.35 | 8.81  | 51.32        | 36.81  | 26.45 | 17.66 |
| 8.13                                   | mCT     | 10.97  | 6.66   | 4.16  | 2.30  | 15.52    | 10.85  | 6.90  | 5.70  | 40.46        | 26.66  | 17.73 | 12.43 |
| 4.83                                   | Vision  | 13.56  | 12.00  | 7.56  | 5.88  | 22.08    | 17.11  | 12.77 | 4.81  | 40.70        | 30.86  | 23.52 | 15.68 |
| 4.93                                   | mCT     | 9.67   | 8.53   | 4.97  | 3.83  | 11.94    | 9.83   | 6.43  | 3.19  | 30.22        | 24.21  | 16.97 | 9.54  |
| 2.53                                   | Vision  | 9.94   | 7.73   | 5.28  | 3.25  | 15.47    | 11.98  | 6.63  | 4.85  | 28.16        | 23.03  | 13.70 | 8.92  |
| 2.51                                   | mCT     | 8.28   | 7.06   | 2.87  | 0.93  | 9.05     | 7.67   | 4.39  | 2.26  | 23.18        | 17.29  | 9.83  | 5.47  |
| 1.37                                   | Vision  | 7.41   | 4.53   | 2.65  | 1.55  | 12.66    | 7.89   | 6.29  | 2.94  | 25.10        | 15.88  | 13.11 | 5.64  |
| 1.54                                   | mCT     | 3.19   | 2.50   | 2.05  | 0.36  | 6.81     | 4.81   | 3.89  | 2.87  | 17.91        | 12.72  | 10.78 | 6.22  |
| 0.80                                   | Vision  | 4.31   | 3.45   | 1.57  | 0.80  | 8.35     | 6.09   | 3.41  | 1.77  | 16.44        | 13.85  | 7.84  | 5.37  |
| 0.79                                   | mCT     | 1.12   | 1.19   | 0.02  | 0.02  | 3.49     | 4.11   | 4.88  | 0.66  | 11.50        | 11.20  | 5.78  | 8.10  |
| 0.43                                   | Vision  | 3.45   | 2.28   | 1.41  | 1.28  | 4.82     | 3.81   | 1.93  | 1.21  | 9.95         | 7.34   | 4.85  | 1.96  |
| 0.48                                   | mCT     | 1.92   | 0.73   | 0.13  | 0.33  | 3.08     | 3.04   | 1.69  | 1.29  | 7.35         | 9.61   | 5.25  | 0.59  |
| 0.26                                   | Vision  | 1.50   | 1.38   | 1.49  | 0.76  | 3.95     | 3.13   | 1.37  | 1.07  | 8.78         | 7.58   | 2.45  | 4.01  |
| 0.25                                   | mCT     | 0.37   | 0.13   | 3.48  | 0.30  | 2.97     | 3.91   | 8.43  | 0.18  | 6.12         | 6.95   | 7.76  | 2.17  |



**Supplemental Table S15: SNR for the 9.7-mm sphere.**

The SNR values are separately presented for the examined PET/CT scanners, reconstruction algorithms and emission times.

| Sphere Activity Concentration (kBq/ml) | Scanner | OSEM   |        |       |       | OSEM+TOF |        |       |       | OSEM+TOF+PSF |        |       |       |
|----------------------------------------|---------|--------|--------|-------|-------|----------|--------|-------|-------|--------------|--------|-------|-------|
|                                        |         | 30 min | 16 min | 8 min | 4 min | 30 min   | 16 min | 8 min | 4 min | 30 min       | 16 min | 8 min | 4 min |
| 24.99                                  | Vision  | 35.92  | 27.78  | 18.72 | 12.85 | 52.81    | 39.00  | 28.32 | 20.09 | 100.62       | 73.80  | 54.52 | 38.37 |
| 24.85                                  | mCT     | 24.68  | 23.51  | 16.51 | 9.46  | 29.40    | 27.76  | 18.37 | 8.81  | 76.88        | 59.12  | 40.52 | 25.62 |
| 15.72                                  | Vision  | 30.92  | 23.23  | 14.71 | 8.88  | 45.98    | 35.37  | 23.09 | 13.55 | 82.33        | 64.45  | 42.74 | 27.43 |
| 15.63                                  | mCT     | 17.20  | 12.84  | 8.14  | 4.70  | 21.15    | 16.44  | 10.65 | 7.62  | 55.17        | 40.88  | 26.68 | 20.00 |
| 8.17                                   | Vision  | 19.23  | 12.32  | 9.47  | 6.59  | 29.94    | 20.62  | 14.88 | 9.43  | 55.49        | 38.19  | 29.11 | 18.84 |
| 8.13                                   | mCT     | 15.61  | 12.56  | 9.82  | 6.97  | 16.52    | 12.55  | 9.79  | 9.07  | 43.27        | 31.56  | 24.75 | 21.41 |
| 4.83                                   | Vision  | 12.69  | 10.93  | 5.62  | 5.84  | 20.67    | 16.03  | 10.02 | 6.08  | 36.80        | 28.49  | 19.25 | 14.19 |
| 4.93                                   | mCT     | 8.62   | 7.14   | 3.77  | 2.68  | 13.54    | 11.73  | 6.75  | 4.42  | 34.29        | 27.84  | 19.04 | 10.01 |
| 2.53                                   | Vision  | 10.70  | 6.88   | 5.76  | 4.77  | 18.91    | 13.14  | 9.48  | 7.03  | 33.68        | 24.96  | 19.21 | 14.21 |
| 2.51                                   | mCT     | 6.59   | 3.06   | 1.74  | 1.25  | 9.24     | 6.78   | 4.44  | 1.82  | 22.64        | 14.24  | 10.19 | 6.90  |
| 1.37                                   | Vision  | 8.75   | 4.81   | 2.86  | 1.60  | 13.48    | 8.52   | 5.31  | 2.99  | 25.75        | 16.48  | 9.57  | 4.84  |
| 1.54                                   | mCT     | 4.93   | 3.86   | 1.79  | 2.47  | 6.10     | 4.13   | 3.15  | 1.87  | 15.94        | 10.30  | 7.29  | 7.77  |
| 0.80                                   | Vision  | 5.95   | 5.08   | 3.03  | 0.41  | 9.95     | 8.56   | 7.88  | 2.74  | 18.43        | 16.39  | 15.31 | 6.28  |
| 0.79                                   | mCT     | 4.19   | 3.70   | 1.26  | 3.66  | 7.79     | 5.38   | 4.02  | 0.90  | 22.25        | 16.09  | 8.38  | 4.15  |
| 0.43                                   | Vision  | 2.00   | 1.43   | 1.06  | 1.44  | 7.02     | 4.96   | 4.35  | 2.84  | 13.47        | 9.73   | 7.95  | 4.56  |
| 0.48                                   | mCT     | 2.36   | 1.79   | 2.92  | 0.15  | 3.37     | 3.48   | 1.91  | 0.12  | 8.45         | 7.66   | 5.82  | 1.70  |
| 0.26                                   | Vision  | 1.15   | 2.01   | 1.16  | 0.40  | 6.31     | 4.42   | 1.96  | 0.56  | 14.34        | 10.51  | 4.57  | 2.27  |
| 0.25                                   | mCT     | 0.86   | 0.70   | 1.31  | 1.94  | 2.21     | 0.25   | 0.26  | 0.18  | 5.89         | 1.97   | 0.04  | 0.21  |
